# Supplementary material for: Genomic and Molecular Profiling of Human Papillomavirus Associated Head and Neck Squamous Cell Carcinoma Treated with Immune Checkpoint Blockade Compared to Survival Outcomes
Source: MDPI journal article supplement (doi:10.3390/cancers13246309), 2021-12-16
Supplement: s1 [file s1]

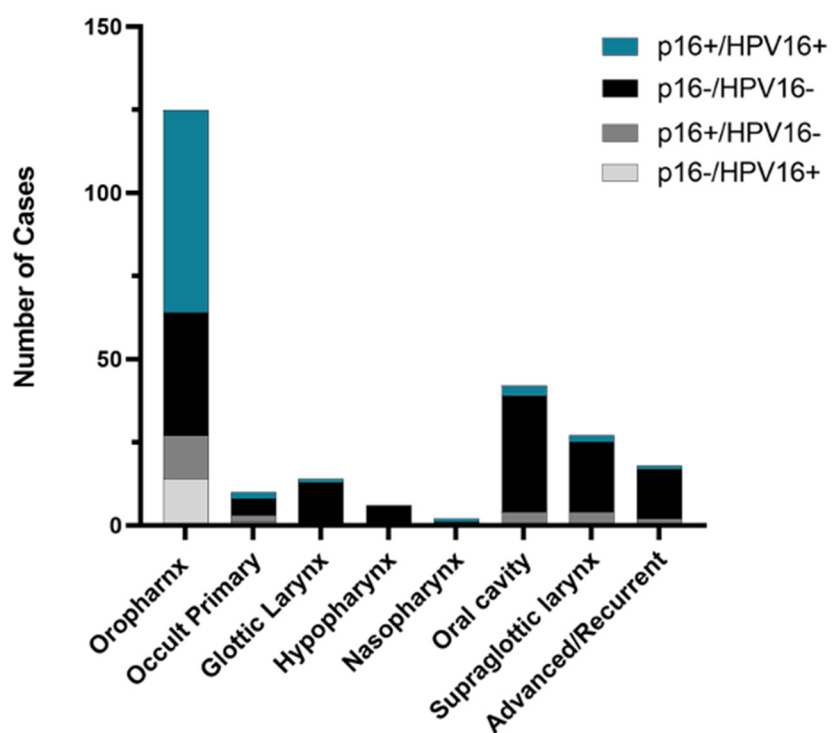

**Figure S1.** Site of origin of HNSCC in the study and p16/HPV discordance: Number of cases within molecular subtypes in HNSCC subgroups defined by primary tumor site and p16/HPV discordance.
